# Supplementary material for: Effects of a Web-Based Tailored Intervention to Reduce Alcohol Consumption in Adults: Randomized Controlled Trial
Source: J Med Internet Res. 2013 Sep 17;15(9):e206. doi: 10.2196/jmir.2568 (PMC3785997; doi:10.2196/jmir.2568)
Supplement: Supplementary file 1 [file jmir_v15i9e206_app1.pdf]

Table 5: *Results of the logistic regression analysis (backward method) with guideline status (not complying = 0; complying = 1) after 6 months as dependent variable and results of the linear regression analysis (backward method) with the number of alcoholic drinks after 6 months as dependent variable after filling missing values with the last observation (LOCF; n = 321)*

|                             | <b>Guideline status (LOCF)</b> |          |            | <b>Number of drinks (LOCF)</b> |          |           |
|-----------------------------|--------------------------------|----------|------------|--------------------------------|----------|-----------|
| <b>Variable<sup>1</sup></b> | <b>OR</b>                      | <b>P</b> | <b>CI</b>  | <b>β</b>                       | <b>P</b> | <b>CI</b> |
| Condition                   | 2.29                           | .009     | 1.23-4.26  | -.07                           | .09      | -4.80-.32 |
| Guideline status            | 4.88                           | <.001    | 2.32-10.27 | ---                            | ---      | ---       |
| Weekly alcohol intake       | .93                            | .002     | .89-.97    | .58                            | <.001    | .61-.84   |
| Habit                       | .34                            | <.001    | .22-.53    | .14                            | .006     | .71-4.32  |
| Age                         | .98                            | .08      | .96-1.00   | ---                            | ---      | ---       |
| Social norm                 | ---                            | ---      | ---        | -.08                           | .07      | -2.04-.09 |
| Self-efficacy               | .48                            | .003     | .29-.77    | .10                            | .045     | .05-3.97  |
| <i>R</i> <sup>2</sup>       | .49                            |          |            | .43                            |          |           |

<sup>1</sup> Assessed at baseline
